# Supplementary material for: Comparison of Gene Coexpression Profiles and Construction of Conserved Gene Networks to Find Functional Modules
Source: PLoS One. 2015 Jul 6;10(7):e0132039. doi: 10.1371/journal.pone.0132039 (PMC4493118; doi:10.1371/journal.pone.0132039)
Supplement: S1 Table — (XLSX) [file pone.0132039.s003.xlsx]

## Sheet: Sheet1
CommunityID	GeneID	Symbol	description
1	1026	CDKN1A	cyclin-dependent kinase inhibitor 1A (p21, Cip1)
1	51206	GP6	glycoprotein VI (platelet)
1	684	BST2	bone marrow stromal cell antigen 2
1	11274	USP18	ubiquitin specific peptidase 18
1	2353	FOS	FBJ murine osteosarcoma viral oncogene homolog
1	80177	MYCT1	myc target 1
1	23569	PADI4	peptidyl arginine deiminase, type IV
1	51218	GLRX5	glutaredoxin 5
1	10266	RAMP2	receptor (G protein-coupled) activity modifying protein 2
1	1051	CEBPB	CCAAT/enhancer binding protein (C/EBP), beta
1	2078	ERG	v-ets avian erythroblastosis virus E26 oncogene homolog
1	23586	DDX58	DEAD (Asp-Glu-Ala-Asp) box polypeptide 58
1	57379	AICDA	activation-induced cytidine deaminase
1	51237	MZB1	marginal zone B and B1 cell-specific protein
1	3112	HLA-DOB	major histocompatibility complex, class II, DO beta
1	5175	PECAM1	platelet/endothelial cell adhesion molecule 1
1	79930	DOK3	docking protein 3
1	3135	HLA-G	major histocompatibility complex, class I, G
1	29760	BLNK	B-cell linker
1	51266	CLEC1B	C-type lectin domain family 1, member B
1	5187	PER1	period circadian clock 1
1	54345	SOX18	SRY (sex determining region Y)-box 18
1	4791	NFKB2	nuclear factor of kappa light polypeptide gene enhancer in B-cells 2 (p49/p100)
1	2321	FLT1	fms-related tyrosine kinase 1
1	8477	GPR65	G protein-coupled receptor 65
1	10318	TNIP1	TNFAIP3 interacting protein 1
1	257106	ARHGAP30	Rho GTPase activating protein 30
1	151636	DTX3L	deltex 3 like, E3 ubiquitin ligase
1	356	FASLG	Fas ligand (TNF superfamily, member 6)
1	51291	GMIP	GEM interacting protein
1	3164	NR4A1	nuclear receptor subfamily 4, group A, member 1
1	23645	PPP1R15A	protein phosphatase 1, regulatory subunit 15A
1	94	ACVRL1	activin A receptor type II-like 1
1	8288	EPX	eosinophil peroxidase
1	9744	ACAP1	ArfGAP with coiled-coil, ankyrin repeat and PH domains 1
1	9314	KLF4	Kruppel-like factor 4 (gut)
1	116835	HSPA12B	heat shock 70kD protein 12B
1	103	ADAR	adenosine deaminase, RNA-specific
1	199786	FAM129C	family with sequence similarity 129, member C
1	58475	MS4A7	membrane-spanning 4-domains, subfamily A, member 7
1	116844	LRG1	leucine-rich alpha-2-glycoprotein 1
1	51312	SLC25A37	solute carrier family 25 (mitochondrial iron transporter), member 37
1	51561	IL23A	interleukin 23, alpha subunit p19
1	134265	AFAP1L1	actin filament associated protein 1-like 1
1	10365	KLF2	Kruppel-like factor 2
1	7294	TXK	TXK tyrosine kinase
1	8320	EOMES	eomesodermin
1	8322	FZD4	frizzled class receptor 4
1	81027	TUBB1	tubulin, beta 1 class VI
1	81030	ZBP1	Z-DNA binding protein 1
1	8328	GFI1B	growth factor independent 1B transcription repressor
1	57018	CCNL1	cyclin L1
1	64651	CSRNP1	cysteine-serine-rich nuclear protein 1
1	729230	CCR2	chemokine (C-C motif) receptor 2
1	114836	SLAMF6	SLAM family member 6
1	219285	SAMD9L	sterile alpha motif domain containing 9-like
1	7318	UBA7	ubiquitin-like modifier activating enzyme 7
1	10394	PRG3	proteoglycan 3
1	2208	FCER2	Fc fragment of IgE, low affinity II, receptor for (CD23)
1	2213	FCGR2B	Fc fragment of IgG, low affinity IIb, receptor (CD32)
1	3240	HP	haptoglobin
1	10410	IFITM3	interferon induced transmembrane protein 3
1	116151	FAM210B	family with sequence similarity 210, member B
1	5292	PIM1	Pim-1 proto-oncogene, serine/threonine kinase
1	9402	GRAP2	GRB2-related adaptor protein 2
1	2235	FECH	ferrochelatase
1	154664	ABCA13	ATP-binding cassette, sub-family A (ABC1), member 13
1	51393	TRPV2	transient receptor potential cation channel, subfamily V, member 2
1	6006	RHCE	Rh blood group, CcEe antigens
1	199	AIF1	allograft inflammatory factor 1
1	6346	CCL1	chemokine (C-C motif) ligand 1
1	6007	RHD	Rh blood group, D antigen
1	3106	HLA-B	major histocompatibility complex, class I, B
1	84174	SLA2	Src-like-adaptor 2
1	25976	TIPARP	TCDD-inducible poly(ADP-ribose) polymerase
1	6354	CCL7	chemokine (C-C motif) ligand 7
1	221395	GPR116	G protein-coupled receptor 116
1	212	ALAS2	aminolevulinate, delta-, synthase 2
1	5336	PLCG2	phospholipase C, gamma 2 (phosphatidylinositol-specific)
1	6364	CCL20	chemokine (C-C motif) ligand 20
1	4319	MMP10	matrix metallopeptidase 10 (stromelysin 2)
1	2701	GJA4	gap junction protein, alpha 4, 37kDa
1	9595	CYTIP	cytohesin 1 interacting protein
1	6372	CXCL6	chemokine (C-X-C motif) ligand 6
1	6373	CXCL11	chemokine (C-X-C motif) ligand 11
1	6375	XCL1	chemokine (C motif) ligand 1
1	9450	LY86	lymphocyte antigen 86
1	51751	HIGD1B	HIG1 hypoxia inducible domain family, member 1B
1	340205	TREML1	triggering receptor expressed on myeloid cells-like 1
1	1263	PLK3	polo-like kinase 3
1	241	ALOX5AP	arachidonate 5-lipoxygenase-activating protein
1	9459	ARHGEF6	Rac/Cdc42 guanine nucleotide exchange factor (GEF) 6
1	8436	SDPR	serum deprivation response
1	3145	HMBS	hydroxymethylbilane synthase
1	23764	MAFF	v-maf avian musculoaponeurotic fibrosarcoma oncogene homolog F
1	4353	MPO	myeloperoxidase
1	6403	SELP	selectin P (granule membrane protein 140kDa, antigen CD62)
1	6404	SELPLG	selectin P ligand
1	3337	DNAJB1	DnaJ (Hsp40) homolog, subfamily B, member 1
1	54538	ROBO4	roundabout, axon guidance receptor, homolog 4 (Drosophila)
1	54541	DDIT4	DNA-damage-inducible transcript 4
1	7441	VPREB1	pre-B lymphocyte 1
1	196883	ADCY4	adenylate cyclase 4
1	80149	ZC3H12A	zinc finger CCCH-type containing 12A
1	7450	VWF	von Willebrand factor
1	89857	KLHL6	kelch-like family member 6
1	285	ANGPT2	angiopoietin 2
1	286	ANK1	ankyrin 1, erythrocytic
1	1316	KLF6	Kruppel-like factor 6
1	64805	P2RY12	purinergic receptor P2Y, G-protein coupled, 12
1	22822	PHLDA1	pleckstrin homology-like domain, family A, member 1
1	29992	PILRA	paired immunoglobin-like type 2 receptor alpha
1	5420	PODXL	podocalyxin-like
1	1326	MAP3K8	mitogen-activated protein kinase kinase kinase 8
1	55601	DDX60	DEAD (Asp-Glu-Ala-Asp) box polypeptide 60
1	2354	FOSB	FBJ murine osteosarcoma viral oncogene homolog B
1	10803	CCR9	chemokine (C-C motif) receptor 9
1	2357	FPR1	formyl peptide receptor 1
1	3383	ICAM1	intercellular adhesion molecule 1
1	3384	ICAM2	intercellular adhesion molecule 2
1	3386	ICAM4	intercellular adhesion molecule 4 (Landsteiner-Wiener blood group)
1	6367	CCL22	chemokine (C-C motif) ligand 22
1	9535	GMFG	glia maturation factor, gamma
1	10561	IFI44	interferon-induced protein 44
1	3394	IRF8	interferon regulatory factor 8
1	330	BIRC3	baculoviral IAP repeat containing 3
1	10125	RASGRP1	RAS guanyl releasing protein 1 (calcium and DAG-regulated)
1	7504	XK	X-linked Kx blood group
1	5473	PPBP	pro-platelet basic protein (chemokine (C-X-C motif) ligand 7)
1	1380	CR2	complement component (3d/Epstein Barr virus) receptor 2
1	3430	IFI35	interferon-induced protein 35
1	6503	SLA	Src-like-adaptor
1	9079	LDB2	LIM domain binding 2
1	3433	IFIT2	interferon-induced protein with tetratricopeptide repeats 2
1	3434	IFIT1	interferon-induced protein with tetratricopeptide repeats 1
1	64231	MS4A6A	membrane-spanning 4-domains, subfamily A, member 6A
1	85358	SHANK3	SH3 and multiple ankyrin repeat domains 3
1	2355	FOSL2	FOS-like antigen 2
1	7538	ZFP36	ZFP36 ring finger protein
1	85363	TRIM5	tripartite motif containing 5
1	374	AREG	amphiregulin
1	9592	IER2	immediate early response 2
1	6521	SLC4A1	solute carrier family 4 (anion exchanger), member 1 (Diego blood group)
1	2623	GATA1	GATA binding protein 1 (globin transcription factor 1)
1	22914	KLRK1	killer cell lectin-like receptor subfamily K, member 1
1	22915	MMRN1	multimerin 1
1	388	RHOB	ras homolog family member B
1	22918	CD93	CD93 molecule
1	393	ARHGAP4	Rho GTPase activating protein 4
1	919	CD247	CD247 molecule
1	415116	PIM3	Pim-3 proto-oncogene, serine/threonine kinase
1	397	ARHGDIB	Rho GDP dissociation inhibitor (GDI) beta
1	4855	NOTCH4	notch 4
1	55363	HEMGN	hemogen
1	4846	NOS3	nitric oxide synthase 3 (endothelial cell)
1	91543	RSAD2	radical S-adenosyl methionine domain containing 2
1	409	ARRB2	arrestin, beta 2
1	239	ALOX12	arachidonate 12-lipoxygenase
1	1440	CSF3	colony stimulating factor 3 (granulocyte)
1	6563	SLC14A1	solute carrier family 14 (urea transporter), member 1 (Kidd blood group)
1	420	ART4	ADP-ribosyltransferase 4 (Dombrock blood group)
1	10661	KLF1	Kruppel-like factor 1 (erythroid)
1	10663	CXCR6	chemokine (C-X-C motif) receptor 6
1	79155	TNIP2	TNFAIP3 interacting protein 2
1	10666	CD226	CD226 molecule
1	53831	GPR84	G protein-coupled receptor 84
1	5553	PRG2	proteoglycan 2, bone marrow (natural killer cell activator, eosinophil granule major basic protein)
1	222642	TSPO2	translocator protein 2
1	8631	SKAP1	src kinase associated phosphoprotein 1
1	3512	IGJ	immunoglobulin J polypeptide, linker protein for immunoglobulin alpha and mu polypeptides
1	8638	OASL	2'-5'-oligoadenylate synthetase-like
1	116159	CYYR1	cysteine/tyrosine-rich 1
1	63940	GPSM3	G-protein signaling modulator 3
1	100141515	C17orf99	chromosome 17 open reading frame 99
1	467	ATF3	activating transcription factor 3
1	1493	CTLA4	cytotoxic T-lymphocyte-associated protein 4
1	85462	FHDC1	FH2 domain containing 1
1	64761	PARP12	poly (ADP-ribose) polymerase family, member 12
1	283897	C16orf54	chromosome 16 open reading frame 54
1	6622	SNCA	synuclein, alpha (non A4 component of amyloid precursor)
1	3552	IL1A	interleukin 1, alpha
1	3553	IL1B	interleukin 1, beta
1	1511	CTSG	cathepsin G
1	3561	IL2RG	interleukin 2 receptor, gamma
1	5610	EIF2AK2	eukaryotic translation initiation factor 2-alpha kinase 2
1	1520	CTSS	cathepsin S
1	1521	CTSW	cathepsin W
1	187	APLNR	apelin receptor
1	3665	IRF7	interferon regulatory factor 7
1	51703	ACSL5	acyl-CoA synthetase long-chain family member 5
1	8698	S1PR4	sphingosine-1-phosphate receptor 4
1	3579	CXCR2	chemokine (C-X-C motif) receptor 2
1	1536	CYBB	cytochrome b-245, beta polypeptide
1	3586	IL10	interleukin 10
1	64005	MYO1G	myosin IG
1	27143	PALD1	phosphatase domain containing, paladin 1
1	4616	GADD45B	growth arrest and DNA-damage-inducible, beta
1	219539	YPEL4	yippee-like 4 (Drosophila)
1	3600	IL15	interleukin 15
1	3604	TNFRSF9	tumor necrosis factor receptor superfamily, member 9
1	5657	PRTN3	proteinase 3
1	7706	TRIM25	tripartite motif containing 25
1	83483	PLVAP	plasmalemma vesicle associated protein
1	3674	ITGA2B	integrin, alpha 2b (platelet glycoprotein IIb of IIb/IIIa complex, antigen CD41)
1	9760	TOX	thymocyte selection-associated high mobility group box
1	79792	GSDMD	gasdermin D
1	51267	CLEC1A	C-type lectin domain family 1, member A
1	8743	TNFSF10	tumor necrosis factor (ligand) superfamily, member 10
1	51752	ERAP1	endoplasmic reticulum aminopeptidase 1
1	26153	KIF26A	kinesin family member 26A
1	3627	CXCL10	chemokine (C-X-C motif) ligand 10
1	3635	INPP5D	inositol polyphosphate-5-phosphatase, 145kDa
1	6708	SPTA1	spectrin, alpha, erythrocytic 1
1	51294	PCDH12	protocadherin 12
1	6710	SPTB	spectrin, beta, erythrocytic
1	8767	RIPK2	receptor-interacting serine-threonine kinase 2
1	5698	PSMB9	proteasome (prosome, macropain) subunit, beta type, 9
1	5699	PSMB10	proteasome (prosome, macropain) subunit, beta type, 10
1	129607	CMPK2	cytidine monophosphate (UMP-CMP) kinase 2, mitochondrial
1	3659	IRF1	interferon regulatory factor 1
1	3662	IRF4	interferon regulatory factor 4
1	26191	PTPN22	protein tyrosine phosphatase, non-receptor type 22 (lymphoid)
1	6737	TRIM21	tripartite motif containing 21
1	53347	UBASH3A	ubiquitin associated and SH3 domain containing A
1	3669	ISG20	interferon stimulated exonuclease gene 20kDa
1	3672	ITGA1	integrin, alpha 1
1	5721	PSME2	proteasome (prosome, macropain) activator subunit 2 (PA28 beta)
1	602	BCL3	B-cell CLL/lymphoma 3
1	64092	SAMSN1	SAM domain, SH3 domain and nuclear localization signals 1
1	608	TNFRSF17	tumor necrosis factor receptor superfamily, member 17
1	5734	PTGER4	prostaglandin E receptor 4 (subtype EP4)
1	9830	TRIM14	tripartite motif containing 14
1	55911	APOBR	apolipoprotein B receptor
1	3690	ITGB3	integrin, beta 3 (platelet glycoprotein IIIa, antigen CD61)
1	8807	IL18RAP	interleukin 18 receptor accessory protein
1	64108	RTP4	receptor (chemosensory) transporter protein 4
1	2669	GEM	GTP binding protein overexpressed in skeletal muscle
1	5743	PTGS2	prostaglandin-endoperoxide synthase 2 (prostaglandin G/H synthase and cyclooxygenase)
1	2672	GFI1	growth factor independent 1 transcription repressor
1	10865	ARID5A	AT rich interactive domain 5A (MRF1-like)
1	3976	LIF	leukemia inhibitory factor
1	64115	C10orf54	chromosome 10 open reading frame 54
1	64919	BCL11B	B-cell CLL/lymphoma 11B (zinc finger protein)
1	4283	CXCL9	chemokine (C-X-C motif) ligand 9
1	3702	ITK	IL2-inducible T-cell kinase
1	23166	STAB1	stabilin 1
1	8832	CD84	CD84 molecule
1	643	CXCR5	chemokine (C-X-C motif) receptor 5
1	645	BLVRB	biliverdin reductase B (flavin reductase (NADPH))
1	64135	IFIH1	interferon induced with helicase C domain 1
1	54922	RASIP1	Ras interacting protein 1
1	83595	SOX7	SRY (sex determining region Y)-box 7
1	3725	JUN	jun proto-oncogene
1	3726	JUNB	jun B proto-oncogene
1	5777	PTPN6	protein tyrosine phosphatase, non-receptor type 6
1	115350	FCRL1	Fc receptor-like 1
1	7832	BTG2	BTG family, member 2
1	27289	RND1	Rho family GTPase 1
1	3738	KCNA3	potassium voltage-gated channel, shaker-related subfamily, member 3
1	5787	PTPRB	protein tyrosine phosphatase, receptor type, B
1	84636	GPR174	G protein-coupled receptor 174
1	669	BPGM	2,3-bisphosphoglycerate mutase
1	10912	GADD45G	growth arrest and DNA-damage-inducible, gamma
1	115361	GBP4	guanylate binding protein 4
1	641700	ECSCR	endothelial cell surface expressed chemotaxis and apoptosis regulator
1	79132	DHX58	DEXH (Asp-Glu-X-His) box polypeptide 58
1	4778	NFE2	nuclear factor, erythroid 2
1	683	BST1	bone marrow stromal cell antigen 1
1	7852	CXCR4	chemokine (C-X-C motif) receptor 4
1	4783	NFIL3	nuclear factor, interleukin 3 regulated
1	3764	KCNJ8	potassium inwardly-rectifying channel, subfamily J, member 8
1	4790	NFKB1	nuclear factor of kappa light polypeptide gene enhancer in B-cells 1
1	9911	TMCC2	transmembrane and coiled-coil domain family 2
1	4792	NFKBIA	nuclear factor of kappa light polypeptide gene enhancer in B-cells inhibitor, alpha
1	4794	NFKBIE	nuclear factor of kappa light polypeptide gene enhancer in B-cells inhibitor, epsilon
1	23157	SEPT6	septin 6
1	6850	SYK	spleen tyrosine kinase
1	1731	SEPT1	septin 1
1	23237	ARC	activity-regulated cytoskeleton-associated protein
1	126669	SHE	Src homology 2 domain containing E
1	1647	GADD45A	growth arrest and DNA-damage-inducible, alpha
1	3791	KDR	kinase insert domain receptor (a type III receptor tyrosine kinase)
1	3792	KEL	Kell blood group, metallo-endopeptidase
1	152273	FGD5	FYVE, RhoGEF and PH domain containing 5
1	9938	ARHGAP25	Rho GTPase activating protein 25
1	10964	IFI44L	interferon-induced protein 44-like
1	728	C5AR1	complement component 5a receptor 1
1	2781	GNAZ	guanine nucleotide binding protein (G protein), alpha z polypeptide
1	55008	HERC6	HECT and RLD domain containing E3 ubiquitin protein ligase family member 6
1	7185	TRAF1	TNF receptor-associated factor 1
1	2791	GNG11	guanine nucleotide binding protein (G protein), gamma 11
1	6890	TAP1	transporter 1, ATP-binding cassette, sub-family B (MDR/TAP)
1	6401	SELE	selectin E
1	4050	LTB	lymphotoxin beta (TNF superfamily, member 3)
1	197358	NLRC3	NLR family, CARD domain containing 3
1	7293	TNFRSF4	tumor necrosis factor receptor superfamily, member 4
1	3824	KLRD1	killer cell lectin-like receptor subfamily D, member 1
1	55080	TAPBPL	TAP binding protein-like
1	759	CA1	carbonic anhydrase I
1	760	CA2	carbonic anhydrase II
1	2811	GP1BA	glycoprotein Ib (platelet), alpha polypeptide
1	2814	GP5	glycoprotein V (platelet)
1	2815	GP9	glycoprotein IX (platelet)
1	640	BLK	BLK proto-oncogene, Src family tyrosine kinase
1	344838	PAQR9	progestin and adipoQ receptor family member IX
1	56253	CRTAM	cytotoxic and regulatory T cell molecule
1	374403	TBC1D10C	TBC1 domain family, member 10C
1	6446	SGK1	serum/glucocorticoid regulated kinase 1
1	4057	LTF	lactotransferrin
1	8993	PGLYRP1	peptidoglycan recognition protein 1
1	4900	NRGN	neurogranin (protein kinase C substrate, RC3)
1	57126	CD177	CD177 molecule
1	1831	TSC22D3	TSC22 domain family, member 3
1	81704	DOCK8	dedicator of cytokinesis 8
1	814	CAMK4	calcium/calmodulin-dependent protein kinase IV
1	1840	DTX1	deltex 1, E3 ubiquitin ligase
1	1843	DUSP1	dual specificity phosphatase 1
1	820	CAMP	cathelicidin antimicrobial peptide
1	1846	DUSP4	dual specificity phosphatase 4
1	1848	DUSP6	dual specificity phosphatase 6
1	1844	DUSP2	dual specificity phosphatase 2
1	84807	NFKBID	nuclear factor of kappa light polypeptide gene enhancer in B-cells inhibitor, delta
1	90952	ESAM	endothelial cell adhesion molecule
1	64332	NFKBIZ	nuclear factor of kappa light polypeptide gene enhancer in B-cells inhibitor, zeta
1	26253	CLEC4E	C-type lectin domain family 4, member E
1	441168	FAM26F	family with sequence similarity 26, member F
1	57169	ZNFX1	zinc finger, NFX1-type containing 1
1	5971	RELB	v-rel avian reticuloendotheliosis viral oncogene homolog B
1	9046	DOK2	docking protein 2, 56kDa
1	9047	SH2D2A	SH2 domain containing 2A
1	9051	PSTPIP1	proline-serine-threonine phosphatase interacting protein 1
1	3932	LCK	LCK proto-oncogene, Src family tyrosine kinase
1	2995	GYPC	glycophorin C (Gerbich blood group)
1	3934	LCN2	lipocalin 2
1	8553	BHLHE40	basic helix-loop-helix family, member e40
1	3936	LCP1	lymphocyte cytosolic protein 1 (L-plastin)
1	3937	LCP2	lymphocyte cytosolic protein 2 (SH2 domain containing leukocyte protein of 76kDa)
1	7010	TEK	TEK tyrosine kinase, endothelial
1	3046	HBE1	hemoglobin, epsilon 1
1	2921	CXCL3	chemokine (C-X-C motif) ligand 3
1	3559	IL2RA	interleukin 2 receptor, alpha
1	5996	RGS1	regulator of G-protein signaling 1
1	1906	EDN1	endothelin 1
1	6003	RGS13	regulator of G-protein signaling 13
1	6005	RHAG	Rh-associated glycoprotein
1	11126	CD160	CD160 molecule
1	3959	LGALS3BP	lectin, galactoside-binding, soluble, 3 binding protein
1	10107	TRIM10	tripartite motif containing 10
1	23424	TDRD7	tudor domain containing 7
1	4940	OAS3	2'-5'-oligoadenylate synthetase 3, 100kDa
1	10562	OLFM4	olfactomedin 4
1	8578	SCARF1	scavenger receptor class F, member 1
1	5008	OSM	oncostatin M
1	9111	NMI	N-myc (and STAT) interactor
1	921	CD5	CD5 molecule
1	923	CD6	CD6 molecule
1	925	CD8A	CD8a molecule
1	926	CD8B	CD8b molecule
1	7071	KLF10	Kruppel-like factor 10
1	7075	TIE1	tyrosine kinase with immunoglobulin-like and EGF-like domains 1
1	932	MS4A3	membrane-spanning 4-domains, subfamily A, member 3 (hematopoietic cell-specific)
1	933	CD22	CD22 molecule
1	1958	EGR1	early growth response 1
1	1959	EGR2	early growth response 2
1	940	CD28	CD28 molecule
1	11182	SLC2A6	solute carrier family 2 (facilitated glucose transporter), member 6
1	11184	MAP4K1	mitogen-activated protein kinase kinase kinase kinase 1
1	840	CASP7	caspase 7, apoptosis-related cysteine peptidase
1	947	CD34	CD34 molecule
1	256949	KANK3	KN motif and ankyrin repeat domains 3
1	2999	GZMH	granzyme H (cathepsin G-like 2, protein h-CCPX)
1	953	ENTPD1	ectonucleoside triphosphate diphosphohydrolase 1
1	7098	TLR3	toll-like receptor 3
1	3003	GZMK	granzyme K (granzyme 3; tryptase II)
1	5450	POU2AF1	POU class 2 associating factor 1
1	958	CD40	CD40 molecule, TNF receptor superfamily member 5
1	5055	SERPINB2	serpin peptidase inhibitor, clade B (ovalbumin), member 2
1	643008	SMIM5	small integral membrane protein 5
1	963	CD53	CD53 molecule
1	79812	MMRN2	multimerin 2
1	1991	ELANE	elastase, neutrophil expressed
1	969	CD69	CD69 molecule
1	971	CD72	CD72 molecule
1	973	CD79A	CD79a molecule, immunoglobulin-associated alpha
1	974	CD79B	CD79b molecule, immunoglobulin-associated beta
1	4049	LTA	lymphotoxin alpha
1	7122	CLDN5	claudin 5
1	7124	TNF	tumor necrosis factor
1	3029	HAGH	hydroxyacylglutathione hydrolase
1	7127	TNFAIP2	tumor necrosis factor, alpha-induced protein 2
1	7128	TNFAIP3	tumor necrosis factor, alpha-induced protein 3
1	50852	TRAT1	T cell receptor associated transmembrane adaptor 1
1	51162	EGFL7	EGF-like-domain, multiple 7
1	10203	CALCRL	calcitonin receptor-like
1	4066	LYL1	lymphoblastic leukemia associated hematopoiesis regulator 1
1	4068	SH2D1A	SH2 domain containing 1A
1	2022	ENG	endoglin
1	3050	HBZ	hemoglobin, zeta
1	10219	KLRG1	killer cell lectin-like receptor subfamily G, member 1
1	10221	TRIB1	tribbles pseudokinase 1
1	55281	TMEM140	transmembrane protein 140
1	2038	EPB42	erythrocyte membrane protein band 4.2
1	55287	TMEM40	transmembrane protein 40
1	7850	IL1R2	interleukin 1 receptor, type II
2	147798	TMC4	transmembrane channel-like 4
2	8710	SERPINB7	serpin peptidase inhibitor, clade B (ovalbumin), member 7
2	146439	CCDC64B	coiled-coil domain containing 64B
2	2312	FLG	filaggrin
2	3849	KRT2	keratin 2
2	84951	TNS4	tensin 4
2	3852	KRT5	keratin 5
2	3853	KRT6A	keratin 6A
2	2065	ERBB3	v-erb-b2 avian erythroblastic leukemia viral oncogene homolog 3
2	3858	KRT10	keratin 10
2	5652	PRSS8	protease, serine, 8
2	3861	KRT14	keratin 14
2	5655	KLK10	kallikrein-related peptidase 10
2	84612	PARD6B	par-6 family cell polarity regulator beta
2	1308	COL17A1	collagen, type XVII, alpha 1
2	3872	KRT17	keratin 17
2	3875	KRT18	keratin 18
2	6692	SPINT1	serine peptidase inhibitor, Kunitz type 1
2	1829	DSG2	desmoglein 2
2	54566	EPB41L4B	erythrocyte membrane protein band 4.1 like 4B
2	810	CALML3	calmodulin-like 3
2	120071	GYLTL1B	glycosyltransferase-like 1B
2	143662	MUC15	mucin 15, cell surface associated
2	57648	KIAA1522	KIAA1522
2	3848	KRT1	keratin 1
2	6707	SPRR3	small proline-rich protein 3
2	126638	RPTN	repetin
2	3898	LAD1	ladinin 1
2	57662	CAMSAP3	calmodulin regulated spectrin-associated protein family, member 3
2	84290	CAPNS2	calpain, small subunit 2
2	124739	USP43	ubiquitin specific peptidase 43
2	57669	EPB41L5	erythrocyte membrane protein band 4.1 like 5
2	2886	GRB7	growth factor receptor-bound protein 7
2	23624	CBLC	Cbl proto-oncogene C, E3 ubiquitin protein ligase
2	53833	IL20RB	interleukin 20 receptor beta
2	28983	TMPRSS11E	transmembrane protease, serine 11E
2	53836	GPR87	G protein-coupled receptor 87
2	7053	TGM3	transglutaminase 3
2	1364	CLDN4	claudin 4
2	54101	RIPK4	receptor-interacting serine-threonine kinase 4
2	1366	CLDN7	claudin 7
2	8796	SCEL	sciellin
2	9053	MAP7	microtubule-associated protein 7
2	51806	CALML5	calmodulin-like 5
2	27237	ARHGEF16	Rho guanine nucleotide exchange factor (GEF) 16
2	79977	GRHL2	grainyhead-like 2 (Drosophila)
2	999	CDH1	cadherin 1, type 1, E-cadherin (epithelial)
2	57530	CGN	cingulin
2	5650	KLK7	kallikrein-related peptidase 7
2	6768	ST14	suppression of tumorigenicity 14 (colon carcinoma)
2	374897	SBSN	suprabasin
2	79767	ELMO3	engulfment and cell motility 3
2	286077	FAM83H	family with sequence similarity 83, member H
2	5653	KLK6	kallikrein-related peptidase 6
2	80004	ESRP2	epithelial splicing regulatory protein 2
2	7051	TGM1	transglutaminase 1
2	79170	PRR15L	proline rich 15-like
2	29841	GRHL1	grainyhead-like 1 (Drosophila)
2	2707	GJB3	gap junction protein, beta 3, 31kDa
2	3993	LLGL2	lethal giant larvae homolog 2 (Drosophila)
2	5017	OVOL1	ovo-like zinc finger 1
2	10053	AP1M2	adaptor-related protein complex 1, mu 2 subunit
2	50848	F11R	F11 receptor
2	51361	HOOK1	hook microtubule-tethering protein 1
2	9635	CLCA2	chloride channel accessory 2
2	6820	SULT2B1	sulfotransferase family, cytosolic, 2B, member 1
2	196264	MPZL3	myelin protein zero-like 3
2	3868	KRT16	keratin 16
2	4014	LOR	loricrin
2	8626	TP63	tumor protein p63
2	374454	KRT77	keratin 77
2	43849	KLK12	kallikrein-related peptidase 12
2	200634	KRTCAP3	keratinocyte associated protein 3
2	9407	TMPRSS11D	transmembrane protease, serine 11D
2	11202	KLK8	kallikrein-related peptidase 8
2	92359	CRB3	crumbs family member 3
2	7113	TMPRSS2	transmembrane protease, serine 2
2	126410	CYP4F22	cytochrome P450, family 4, subfamily F, polypeptide 22
2	1999	ELF3	E74-like factor 3 (ets domain transcription factor, epithelial-specific )
2	55971	BAIAP2L1	BAI1-associated protein 2-like 1
2	286676	ILDR1	immunoglobulin-like domain containing receptor 1
2	91862	MARVELD3	MARVEL domain containing 3
2	29911	HOOK2	hook microtubule-tethering protein 2
2	113828	FAM83F	family with sequence similarity 83, member F
2	149466	C1orf210	chromosome 1 open reading frame 210
2	57822	GRHL3	grainyhead-like 3 (Drosophila)
2	4645	MYO5B	myosin VB
2	4582	MUC1	mucin 1, cell surface associated
2	126695	KDF1	keratinocyte differentiation factor 1
2	4072	EPCAM	epithelial cell adhesion molecule
2	242	ALOX12B	arachidonate 12-lipoxygenase, 12R type
2	55286	C4orf19	chromosome 4 open reading frame 19
2	2810	SFN	stratifin
2	58495	OVOL2	ovo-like zinc finger 2
2	64284	RAB17	RAB17, member RAS oncogene family
2	27134	TJP3	tight junction protein 3
2	1365	CLDN3	claudin 3
3	5376	PMP22	peripheral myelin protein 22
3	1281	COL3A1	collagen, type III, alpha 1
3	1284	COL4A2	collagen, type IV, alpha 2
3	11015	KDELR3	KDEL (Lys-Asp-Glu-Leu) endoplasmic reticulum protein retention receptor 3
3	1289	COL5A1	collagen, type V, alpha 1
3	1291	COL6A1	collagen, type VI, alpha 1
3	1292	COL6A2	collagen, type VI, alpha 2
3	1293	COL6A3	collagen, type VI, alpha 3
3	8974	P4HA2	prolyl 4-hydroxylase, alpha polypeptide II
3	493869	GPX8	glutathione peroxidase 8 (putative)
3	1809	DPYSL3	dihydropyrimidinase-like 3
3	5396	PRRX1	paired related homeobox 1
3	6678	SPARC	secreted protein, acidic, cysteine-rich (osteonectin)
3	4313	MMP2	matrix metallopeptidase 2 (gelatinase A, 72kDa gelatinase, 72kDa type IV collagenase)
3	1306	COL15A1	collagen, type XV, alpha 1
3	57007	ACKR3	atypical chemokine receptor 3
3	2335	FN1	fibronectin 1
3	57124	CD248	CD248 molecule, endosialin
3	10536	LEPREL2	leprecan-like 2
3	54829	ASPN	asporin
3	25903	OLFML2B	olfactomedin-like 2B
3	51421	AMOTL2	angiomotin like 2
3	60681	FKBP10	FK506 binding protein 10, 65 kDa
3	54587	MXRA8	matrix-remodelling associated 8
3	140606	SELM	selenoprotein M
3	10052	GJC1	gap junction protein, gamma 1, 45kDa
3	3912	LAMB1	laminin, beta 1
3	3913	LAMB2	laminin, beta 2 (laminin S)
3	3915	LAMC1	laminin, gamma 1 (formerly LAMB2)
3	117581	TWIST2	twist family bHLH transcription factor 2
3	4430	MYO1B	myosin IB
3	11096	ADAMTS5	ADAM metallopeptidase with thrombospondin type 1 motif, 5
3	11098	PRSS23	protease, serine, 23
3	7003	TEAD1	TEA domain family member 1 (SV40 transcriptional enhancer factor)
3	10082	GPC6	glypican 6
3	8038	ADAM12	ADAM metallopeptidase domain 12
3	871	SERPINH1	serpin peptidase inhibitor, clade H (heat shock protein 47), member 1, (collagen binding protein 1)
3	5480	PPIC	peptidylprolyl isomerase C (cyclophilin C)
3	5738	PTGFRN	prostaglandin F2 receptor inhibitor
3	11117	EMILIN1	elastin microfibril interfacer 1
3	1902	LPAR1	lysophosphatidic acid receptor 1
3	10609	LEPREL4	leprecan-like 4
3	3956	LGALS1	lectin, galactoside-binding, soluble, 1
3	1909	EDNRA	endothelin receptor type A
3	5754	PTK7	protein tyrosine kinase 7
3	7291	TWIST1	twist family bHLH transcription factor 1
3	81792	ADAMTS12	ADAM metallopeptidase with thrombospondin type 1 motif, 12
3	7043	TGFB3	transforming growth factor, beta 3
3	8840	WISP1	WNT1 inducible signaling pathway protein 1
3	81035	COLEC12	collectin sub-family member 12
3	7057	THBS1	thrombospondin 1
3	7058	THBS2	thrombospondin 2
3	2195	FAT1	FAT atypical cadherin 1
3	83604	TMEM47	transmembrane protein 47
3	5358	PLS3	plastin 3
3	3490	IGFBP7	insulin-like growth factor binding protein 7
3	165	AEBP1	AE binding protein 1
3	7082	TJP1	tight junction protein 1
3	23213	SULF1	sulfatase 1
3	64175	LEPRE1	leucine proline-enriched proteoglycan (leprecan) 1
3	1634	DCN	decorin
3	1462	VCAN	versican
3	1464	CSPG4	chondroitin sulfate proteoglycan 4
3	55742	PARVA	parvin, alpha
3	55243	KIRREL	kin of IRRE like (Drosophila)
3	115908	CTHRC1	collagen triple helix repeat containing 1
3	84168	ANTXR1	anthrax toxin receptor 1
3	716	C1S	complement component 1, s subcomponent
3	4811	NID1	nidogen 1
3	51148	CERCAM	cerebral endothelial cell adhesion molecule
3	50509	COL5A3	collagen, type V, alpha 3
3	4052	LTBP1	latent transforming growth factor beta binding protein 1
3	4053	LTBP2	latent transforming growth factor beta binding protein 2
3	284119	PTRF	polymerase I and transcript release factor
3	26585	GREM1	gremlin 1, DAN family BMP antagonist
3	4060	LUM	lumican
3	3037	HAS2	hyaluronan synthase 2
3	10413	YAP1	Yes-associated protein 1
3	10979	FERMT2	fermitin family member 2
3	54510	PCDH18	protocadherin 18
3	6383	SDC2	syndecan 2
3	57333	RCN3	reticulocalbin 3, EF-hand calcium binding domain
3	1277	COL1A1	collagen, type I, alpha 1
4	4608	MYBPH	myosin binding protein H
4	148738	HFE2	hemochromatosis type 2 (juvenile)
4	137735	ABRA	actin-binding Rho activating protein
4	779	CACNA1S	calcium channel, voltage-dependent, L type, alpha 1S subunit
4	4621	MYH3	myosin, heavy chain 3, skeletal muscle, embryonic
4	270	AMPD1	adenosine monophosphate deaminase 1
4	165904	XIRP1	xin actin-binding repeat containing 1
4	4625	MYH7	myosin, heavy chain 7, cardiac muscle, beta
4	4626	MYH8	myosin, heavy chain 8, skeletal muscle, perinatal
4	89	ACTN3	actinin, alpha 3
4	4632	MYL1	myosin, light chain 1, alkali; skeletal, fast
4	5913	RAPSN	receptor-associated protein of the synapse
4	4634	MYL3	myosin, light chain 3, alkali; ventricular, skeletal, slow
4	9499	MYOT	myotilin
4	4892	NRAP	nebulin-related anchoring protein
4	786	CACNG1	calcium channel, voltage-dependent, gamma subunit 1
4	127495	LRRC39	leucine rich repeat containing 39
4	150572	SMYD1	SET and MYND domain containing 1
4	131377	KLHL40	kelch-like family member 40
4	6450	SH3BGR	SH3 domain binding glutamate-rich protein
4	4151	MB	myoglobin
4	58	ACTA1	actin, alpha 1, skeletal muscle
4	1339	COX6A2	cytochrome c oxidase subunit VIa polypeptide 2
4	79933	SYNPO2L	synaptopodin 2-like
4	127294	MYOM3	myomesin 3
4	51778	MYOZ2	myozenin 2
4	4619	MYH1	myosin, heavy chain 1, skeletal muscle, adult
4	29765	TMOD4	tropomodulin 4 (muscle)
4	70	ACTC1	actin, alpha, cardiac muscle 1
4	92235	DUSP27	dual specificity phosphatase 27 (putative)
4	79442	LRRC2	leucine rich repeat containing 2
4	10324	KLHL41	kelch-like family member 41
4	4622	MYH4	myosin, heavy chain 4, skeletal muscle
4	253017	TECRL	trans-2,3-enoyl-CoA reductase-like
4	4703	NEB	nebulin
4	442721	LMOD2	leiomodin 2 (cardiac)
4	5224	PGAM2	phosphoglycerate mutase 2 (muscle)
4	7273	TTN	titin
4	8557	TCAP	titin-cap
4	8048	CSRP3	cysteine and glycine-rich protein 3 (cardiac LIM protein)
4	10611	PDLIM5	PDZ and LIM domain 5
4	282996	RBM20	RNA binding motif protein 20
4	6261	RYR1	ryanodine receptor 1 (skeletal)
4	285556	LOC285556	uncharacterized LOC285556
4	2170	FABP3	fatty acid binding protein 3, muscle and heart (mammary-derived growth inhibitor)
4	1160	CKMT2	creatine kinase, mitochondrial 2 (sarcomeric)
4	347273	MURC	muscle-related coiled-coil protein
4	1674	DES	desmin
4	56203	LMOD3	leiomodin 3 (fetal)
4	4633	MYL2	myosin, light chain 2, regulatory, cardiac, slow
4	167838	TXLNB	taxilin beta
4	10930	APOBEC2	apolipoprotein B mRNA editing enzyme, catalytic polypeptide-like 2
4	27063	ANKRD1	ankyrin repeat domain 1 (cardiac muscle)
4	84665	MYPN	myopalladin
4	29895	MYLPF	myosin light chain, phosphorylatable, fast skeletal muscle
4	5837	PYGM	phosphorylase, glycogen, muscle
4	9172	MYOM2	myomesin 2
4	7125	TNNC2	troponin C type 2 (fast)
4	51676	ASB2	ankyrin repeat and SOCS box containing 2
4	7135	TNNI1	troponin I type 1 (skeletal, slow)
4	7136	TNNI2	troponin I type 2 (skeletal, fast)
4	7138	TNNT1	troponin T type 1 (skeletal, slow)
4	7140	TNNT3	troponin T type 3 (skeletal, fast)
4	487	ATP2A1	ATPase, Ca++ transporting, cardiac muscle, fast twitch 1
4	4604	MYBPC1	myosin binding protein C, slow type
4	4606	MYBPC2	myosin binding protein C, fast type
4	342527	SMTNL2	smoothelin-like 2
5	4867	NPHP1	nephronophthisis 1 (juvenile)
5	55815	TSNAXIP1	translin-associated factor X interacting protein 1
5	27019	DNAI1	dynein, axonemal, intermediate chain 1
5	136332	LRGUK	leucine-rich repeats and guanylate kinase domain containing
5	255119	C4orf22	chromosome 4 open reading frame 22
5	92304	SCGB3A1	secretoglobin, family 3A, member 1
5	85016	C11orf70	chromosome 11 open reading frame 70
5	89876	MAATS1	MYCBP-associated, testis expressed 1
5	27285	TEKT2	tektin 2 (testicular)
5	64792	IFT22	intraflagellar transport 22
5	257177	C1orf192	chromosome 1 open reading frame 192
5	644890	MEIG1	meiosis/spermiogenesis associated 1
5	146845	WDR16	WD repeat domain 16
5	219681	ARMC3	armadillo repeat containing 3
5	51364	ZMYND10	zinc finger, MYND-type containing 10
5	89765	RSPH1	radial spoke head 1 homolog (Chlamydomonas)
5	345895	RSPH4A	radial spoke head 4 homolog A (Chlamydomonas)
5	144809	FAM216B	family with sequence similarity 216, member B
5	138162	C9orf116	chromosome 9 open reading frame 116
5	83894	TTC29	tetratricopeptide repeat domain 29
5	65975	STK33	serine/threonine kinase 33
5	133690	CAPSL	calcyphosine-like
5	120379	PIH1D2	PIH1 domain containing 2
5	25790	CFAP45	cilia and flagella associated protein 45
5	400566	C17orf97	chromosome 17 open reading frame 97
5	27077	B9D1	B9 protein domain 1
5	619208	FAM229B	family with sequence similarity 229, member B
5	154313	C6orf165	chromosome 6 open reading frame 165
5	83659	TEKT1	tektin 1
5	283726	FAM154B	family with sequence similarity 154, member B
5	8382	NME5	NME/NM23 family member 5
5	83538	TTC25	tetratricopeptide repeat domain 25
5	127700	OSCP1	organic solute carrier partner 1
5	60494	CCDC81	coiled-coil domain containing 81
5	128344	PIFO	primary cilia formation
5	80217	CFAP43	cilia and flagella associated protein 43
5	57562	KIAA1377	KIAA1377
5	643037	C11orf97	chromosome 11 open reading frame 97
5	145376	PPP1R36	protein phosphatase 1, regulatory subunit 36
5	126820	WDR63	WD repeat domain 63
5	85478	CCDC65	coiled-coil domain containing 65
5	79846	CFAP69	cilia and flagella associated protein 69
5	220136	CCDC11	coiled-coil domain containing 11
5	729967	MORN2	MORN repeat containing 2
5	154865	IQUB	IQ motif and ubiquitin domain containing
5	127733	UBXN10	UBX domain protein 10
5	84217	ZMYND12	zinc finger, MYND-type containing 12
5	79989	TTC26	tetratricopeptide repeat domain 26
6	259	AMBP	alpha-1-microglobulin/bikunin precursor
6	1544	CYP1A2	cytochrome P450, family 1, subfamily A, polypeptide 2
6	6291	SAA4	serum amyloid A4, constitutive
6	1557	CYP2C19	cytochrome P450, family 2, subfamily C, polypeptide 19
6	10841	FTCD	formimidoyltransferase cyclodeaminase
6	3484	IGFBP1	insulin-like growth factor binding protein 1
6	1370	CPN2	carboxypeptidase N, polypeptide 2
6	54363	HAO1	hydroxyacid oxidase (glycolate oxidase) 1
6	116519	APOA5	apolipoprotein A-V
6	3242	HPD	4-hydroxyphenylpyruvate dioxygenase
6	4143	MAT1A	methionine adenosyltransferase I, alpha
6	112817	HOGA1	4-hydroxy-2-oxoglutarate aldolase 1
6	3263	HPX	hemopexin
6	27329	ANGPTL3	angiopoietin-like 3
6	2243	FGA	fibrinogen alpha chain
6	2244	FGB	fibrinogen beta chain
6	731	C8A	complement component 8, alpha polypeptide
6	8647	ABCB11	ATP-binding cassette, sub-family B (MDR/TAP), member 11
6	3273	HRG	histidine-rich glycoprotein
6	23498	HAAO	3-hydroxyanthranilate 3,4-dioxygenase
6	462	SERPINC1	serpin peptidase inhibitor, clade C (antithrombin), member 1
6	336	APOA2	apolipoprotein A-II
6	1361	CPB2	carboxypeptidase B2 (plasma)
6	51156	SERPINA10	serpin peptidase inhibitor, clade A (alpha-1 antiproteinase, antitrypsin), member 10
6	2646	GCKR	glucokinase (hexokinase 4) regulator
6	345	APOC3	apolipoprotein C-III
6	346	APOC4	apolipoprotein C-IV
6	84699	CREB3L3	cAMP responsive element binding protein 3-like 3
6	732	C8B	complement component 8, beta polypeptide
6	350	APOH	apolipoprotein H (beta-2-glycoprotein I)
6	735	C9	complement component 9
6	2147	F2	coagulation factor II (thrombin)
6	55908	C19orf80	chromosome 19 open reading frame 80
6	3818	KLKB1	kallikrein B, plasma (Fletcher factor) 1
6	7276	TTR	transthyretin
6	10991	SLC38A3	solute carrier family 38, member 3
6	2160	F11	coagulation factor XI
6	3697	ITIH1	inter-alpha-trypsin inhibitor heavy chain 1
6	3698	ITIH2	inter-alpha-trypsin inhibitor heavy chain 2
6	3699	ITIH3	inter-alpha-trypsin inhibitor heavy chain 3
6	1401	CRP	C-reactive protein, pentraxin-related
6	6906	SERPINA7	serpin peptidase inhibitor, clade A (alpha-1 antiproteinase, antitrypsin), member 7
6	10747	MASP2	mannan-binding lectin serine peptidase 2
7	9349	RPL23	ribosomal protein L23
7	6152	RPL24	ribosomal protein L24
7	6155	RPL27	ribosomal protein L27
7	6157	RPL27A	ribosomal protein L27a
7	1937	EEF1G	eukaryotic translation elongation factor 1 gamma
7	1938	EEF2	eukaryotic translation elongation factor 2
7	6164	RPL34	ribosomal protein L34
7	6168	RPL37A	ribosomal protein L37a
7	5935	RBM3	RNA binding motif (RNP1, RRM) protein 3
7	6173	RPL36A	ribosomal protein L36a
7	6175	RPLP0	ribosomal protein, large, P0
7	6176	RPLP1	ribosomal protein, large, P1
7	8667	EIF3H	eukaryotic translation initiation factor 3, subunit H
7	6187	RPS2	ribosomal protein S2
7	6191	RPS4X	ribosomal protein S4, X-linked
7	6194	RPS6	ribosomal protein S6
7	6202	RPS8	ribosomal protein S8
7	10399	GNB2L1	guanine nucleotide binding protein (G protein), beta polypeptide 2-like 1
7	6204	RPS10	ribosomal protein S10
7	26986	PABPC1	poly(A) binding protein, cytoplasmic 1
7	3646	EIF3E	eukaryotic translation initiation factor 3, subunit E
7	6210	RPS15A	ribosomal protein S15a
7	1933	EEF1B2	eukaryotic translation elongation factor 1 beta 2
7	3921	RPSA	ribosomal protein SA
7	6227	RPS21	ribosomal protein S21
7	200916	RPL22L1	ribosomal protein L22-like 1
7	6230	RPS25	ribosomal protein S25
7	6231	RPS26	ribosomal protein S26
7	6232	RPS27	ribosomal protein S27
7	6223	RPS19	ribosomal protein S19
7	4282	MIF	macrophage migration inhibitory factor (glycosylation-inhibiting factor)
7	23521	RPL13A	ribosomal protein L13a
7	6203	RPS9	ribosomal protein S9
7	6161	RPL32	ribosomal protein L32
7	6122	RPL3	ribosomal protein L3
7	6124	RPL4	ribosomal protein L4
7	6128	RPL6	ribosomal protein L6
7	6129	RPL7	ribosomal protein L7
7	6235	RPS29	ribosomal protein S29
7	6134	RPL10	ribosomal protein L10
7	6141	RPL18	ribosomal protein L18
7	6143	RPL19	ribosomal protein L19
8	7385	UQCRC2	ubiquinol-cytochrome c reductase core protein II
8	515	ATP5F1	ATP synthase, H+ transporting, mitochondrial Fo complex, subunit B1
8	51079	NDUFA13	NADH dehydrogenase (ubiquinone) 1 alpha subcomplex, 13
8	522	ATP5J	ATP synthase, H+ transporting, mitochondrial Fo complex, subunit F6
8	54539	NDUFB11	NADH dehydrogenase (ubiquinone) 1 beta subcomplex, 11, 17.3kDa
8	9551	ATP5J2	ATP synthase, H+ transporting, mitochondrial Fo complex, subunit F2
8	51024	FIS1	fission 1 (mitochondrial outer membrane) homolog (S. cerevisiae)
8	4729	NDUFV2	NADH dehydrogenase (ubiquinone) flavoprotein 2, 24kDa
8	4696	NDUFA3	NADH dehydrogenase (ubiquinone) 1 alpha subcomplex, 3, 9kDa
8	3033	HADH	hydroxyacyl-CoA dehydrogenase
8	7386	UQCRFS1	ubiquinol-cytochrome c reductase, Rieske iron-sulfur polypeptide 1
8	10063	COX17	COX17 cytochrome c oxidase copper chaperone
8	10975	UQCR11	ubiquinol-cytochrome c reductase, complex III subunit XI
8	4704	NDUFA9	NADH dehydrogenase (ubiquinone) 1 alpha subcomplex, 9, 39kDa
8	9377	COX5A	cytochrome c oxidase subunit Va
8	8802	SUCLG1	succinate-CoA ligase, alpha subunit
8	29796	UQCR10	ubiquinol-cytochrome c reductase, complex III subunit X
8	38	ACAT1	acetyl-CoA acetyltransferase 1
8	4711	NDUFB5	NADH dehydrogenase (ubiquinone) 1 beta subcomplex, 5, 16kDa
8	140823	ROMO1	reactive oxygen species modulator 1
8	4714	NDUFB8	NADH dehydrogenase (ubiquinone) 1 beta subcomplex, 8, 19kDa
8	4717	NDUFC1	NADH dehydrogenase (ubiquinone) 1, subcomplex unknown, 1, 6kDa
8	4719	NDUFS1	NADH dehydrogenase (ubiquinone) Fe-S protein 1, 75kDa (NADH-coenzyme Q reductase)
8	498	ATP5A1	ATP synthase, H+ transporting, mitochondrial F1 complex, alpha subunit 1, cardiac muscle
8	5438	POLR2I	polymerase (RNA) II (DNA directed) polypeptide I, 14.5kDa
8	2110	ETFDH	electron-transferring-flavoprotein dehydrogenase
8	4695	NDUFA2	NADH dehydrogenase (ubiquinone) 1 alpha subcomplex, 2, 8kDa
8	1337	COX6A1	cytochrome c oxidase subunit VIa polypeptide 1
8	506	ATP5B	ATP synthase, H+ transporting, mitochondrial F1 complex, beta polypeptide
8	4191	MDH2	malate dehydrogenase 2, NAD (mitochondrial)
8	509	ATP5C1	ATP synthase, H+ transporting, mitochondrial F1 complex, gamma polypeptide 1
8	440574	MINOS1	mitochondrial inner membrane organizing system 1
9	9601	PDIA4	protein disulfide isomerase family A, member 4
9	54187	NANS	N-acetylneuraminic acid synthase
9	56005	C19orf10	chromosome 19 open reading frame 10
9	79174	CRELD2	cysteine-rich with EGF-like domains 2
9	7873	MANF	mesencephalic astrocyte-derived neurotrophic factor
9	10952	SEC61B	Sec61 beta subunit
9	58505	OSTC	oligosaccharyltransferase complex subunit (non-catalytic)
9	10954	PDIA5	protein disulfide isomerase family A, member 5
9	3703	STT3A	STT3A, subunit of the oligosaccharyltransferase complex (catalytic)
9	51726	DNAJB11	DnaJ (Hsp40) homolog, subfamily B, member 11
9	9871	SEC24D	SEC24 family member D
9	7184	HSP90B1	heat shock protein 90kDa beta (Grp94), member 1
9	10130	PDIA6	protein disulfide isomerase family A, member 6
9	6745	SSR1	signal sequence receptor, alpha
9	6746	SSR2	signal sequence receptor, beta (translocon-associated protein beta)
9	6748	SSR4	signal sequence receptor, delta
9	10525	HYOU1	hypoxia up-regulated 1
9	81502	HM13	histocompatibility (minor) 13
9	29925	GMPPB	GDP-mannose pyrophosphorylase B
9	5479	PPIB	peptidylprolyl isomerase B (cyclophilin B)
9	6184	RPN1	ribophorin I
9	6185	RPN2	ribophorin II
9	2923	PDIA3	protein disulfide isomerase family A, member 3
9	3309	HSPA5	heat shock 70kDa protein 5 (glucose-regulated protein, 78kDa)
9	2286	FKBP2	FK506 binding protein 2, 13kDa
9	55741	EDEM2	ER degradation enhancer, mannosidase alpha-like 2
9	10483	SEC23B	Sec23 homolog B (S. cerevisiae)
9	821	CANX	calnexin
9	23753	SDF2L1	stromal cell-derived factor 2-like 1
9	11014	KDELR2	KDEL (Lys-Asp-Glu-Leu) endoplasmic reticulum protein retention receptor 2
9	10237	SLC35B1	solute carrier family 35, member B1
10	65985	AACS	acetoacetyl-CoA synthetase
10	1718	DHCR24	24-dehydrocholesterol reductase
10	6721	SREBF2	sterol regulatory element binding transcription factor 2
10	4047	LSS	lanosterol synthase (2,3-oxidosqualene-lanosterol cyclase)
10	3156	HMGCR	3-hydroxy-3-methylglutaryl-CoA reductase
10	3157	HMGCS1	3-hydroxy-3-methylglutaryl-CoA synthase 1 (soluble)
10	51478	HSD17B7	hydroxysteroid (17-beta) dehydrogenase 7
10	3992	FADS1	fatty acid desaturase 1
10	11161	C14orf1	chromosome 14 open reading frame 1
10	134429	STARD4	StAR-related lipid transfer (START) domain containing 4
10	3422	IDI1	isopentenyl-diphosphate delta isomerase 1
10	6309	SC5D	sterol-C5-desaturase
10	2181	ACSL3	acyl-CoA synthetase long-chain family member 3
10	6307	MSMO1	methylsterol monooxygenase 1
10	51109	RDH11	retinol dehydrogenase 11 (all-trans/9-cis/11-cis)
10	39	ACAT2	acetyl-CoA acetyltransferase 2
10	31	ACACA	acetyl-CoA carboxylase alpha
10	3949	LDLR	low density lipoprotein receptor
10	2222	FDFT1	farnesyl-diphosphate farnesyltransferase 1
10	6319	SCD	stearoyl-CoA desaturase (delta-9-desaturase)
10	2224	FDPS	farnesyl diphosphate synthase
10	1717	DHCR7	7-dehydrocholesterol reductase
10	3638	INSIG1	insulin induced gene 1
10	6713	SQLE	squalene epoxidase
10	10682	EBP	emopamil binding protein (sterol isomerase)
10	1595	CYP51A1	cytochrome P450, family 51, subfamily A, polypeptide 1
10	50814	NSDHL	NAD(P) dependent steroid dehydrogenase-like
10	4597	MVD	mevalonate (diphospho) decarboxylase
11	730755	KRTAP2-3	keratin associated protein 2-3
11	3885	KRT34	keratin 34
11	81872	KRTAP2-1	keratin associated protein 2-1
11	653240	KRTAP4-11	keratin associated protein 4-11
11	55507	GPRC5D	G protein-coupled receptor, class C, group 5, member D
11	85294	KRTAP2-4	keratin associated protein 2-4
11	7062	TCHH	trichohyalin
11	337882	KRTAP19-1	keratin associated protein 19-1
11	81871	KRTAP4-6	keratin associated protein 4-6
11	112802	KRT71	keratin 71
11	3881	KRT31	keratin 31
11	85290	KRTAP4-3	keratin associated protein 4-3
11	3883	KRT33A	keratin 33A
11	3884	KRT33B	keratin 33B
11	85293	KRTAP3-3	keratin associated protein 3-3
11	3886	KRT35	keratin 35
11	147183	KRT25	keratin 25
11	3891	KRT85	keratin 85
11	83896	KRTAP3-1	keratin associated protein 3-1
11	342574	KRT27	keratin 27
11	100132476	KRTAP4-7	keratin associated protein 4-7
11	3882	KRT32	keratin 32
11	83902	KRTAP17-1	keratin associated protein 17-1
12	50624	CUZD1	CUB and zona pellucida-like domains 1
12	11330	CTRC	chymotrypsin C (caldecrin)
12	440387	CTRB2	chymotrypsinogen B2
12	5319	PLA2G1B	phospholipase A2, group IB (pancreas)
12	130120	REG3G	regenerating islet-derived 3 gamma
12	23436	CELA3B	chymotrypsin-like elastase family, member 3B
12	5644	PRSS1	protease, serine, 1 (trypsin 1)
12	1357	CPA1	carboxypeptidase A1 (pancreatic)
12	1358	CPA2	carboxypeptidase A2 (pancreatic)
12	5968	REG1B	regenerating islet-derived 1 beta
12	5276	SERPINI2	serpin peptidase inhibitor, clade I (pancpin), member 2
12	5406	PNLIP	pancreatic lipase
12	5407	PNLIPRP1	pancreatic lipase-related protein 1
12	5408	PNLIPRP2	pancreatic lipase-related protein 2
12	1360	CPB1	carboxypeptidase B1 (tissue)
12	1506	CTRL	chymotrypsin-like
12	5539	PPY	pancreatic polypeptide
12	3375	IAPP	islet amyloid polypeptide
12	342898	SYCN	syncollin
12	1208	CLPS	colipase, pancreatic
12	63036	CELA2A	chymotrypsin-like elastase family, member 2A
12	2813	GP2	glycoprotein 2 (zymogen granule membrane)
13	5957	RCVRN	recoverin
13	5132	PDC	phosducin
13	6101	RP1	retinitis pigmentosa 1 (autosomal dominant)
13	6295	SAG	S-antigen; retina and pineal gland (arrestin)
13	56344	CABP5	calcium binding protein 5
13	5145	PDE6A	phosphodiesterase 6A, cGMP-specific, rod, alpha
13	5146	PDE6C	phosphodiesterase 6C, cGMP-specific, cone, alpha prime
13	2779	GNAT1	guanine nucleotide binding protein (G protein), alpha transducing activity polypeptide 1
13	5148	PDE6G	phosphodiesterase 6G, cGMP-specific, rod, gamma
13	5149	PDE6H	phosphodiesterase 6H, cGMP-specific, cone, gamma
13	2784	GNB3	guanine nucleotide binding protein (G protein), beta polypeptide 3
13	3617	IMPG1	interphotoreceptor matrix proteoglycan 1
13	4901	NRL	neural retina leucine zipper
13	2792	GNGT1	guanine nucleotide binding protein (G protein), gamma transducing activity polypeptide 1
13	341405	ANKRD33	ankyrin repeat domain 33
13	169522	KCNV2	potassium channel, subfamily V, member 2
13	388531	RGS9BP	regulator of G protein signaling 9 binding protein
13	7287	TULP1	tubby like protein 1
13	343035	RD3	retinal degeneration 3
13	5949	RBP3	retinol binding protein 3, interstitial
13	1406	CRX	cone-rod homeobox
14	833	CARS	cysteinyl-tRNA synthetase
14	5831	PYCR1	pyrroline-5-carboxylate reductase 1
14	8140	SLC7A5	solute carrier family 7 (amino acid transporter light chain, L system), member 5
14	6541	SLC7A1	solute carrier family 7 (cationic amino acid transporter, y+ system), member 1
14	10797	MTHFD2	methylenetetrahydrofolate dehydrogenase (NADP+ dependent) 2, methenyltetrahydrofolate cyclohydrolase
14	29968	PSAT1	phosphoserine aminotransferase 1
14	6301	SARS	seryl-tRNA synthetase
14	57761	TRIB3	tribbles pseudokinase 3
14	16	AARS	alanyl-tRNA synthetase
14	4141	MARS	methionyl-tRNA synthetase
14	25902	MTHFD1L	methylenetetrahydrofolate dehydrogenase (NADP+ dependent) 1-like
14	3376	IARS	isoleucyl-tRNA synthetase
14	6897	TARS	threonyl-tRNA synthetase
14	5106	PCK2	phosphoenolpyruvate carboxykinase 2 (mitochondrial)
14	26227	PHGDH	phosphoglycerate dehydrogenase
14	8565	YARS	tyrosyl-tRNA synthetase
14	79094	CHAC1	ChaC, cation transport regulator homolog 1 (E. coli)
14	440	ASNS	asparagine synthetase (glutamine-hydrolyzing)
14	2617	GARS	glycyl-tRNA synthetase
15	93377	OPALIN	oligodendrocytic myelin paranodal and inner loop protein
15	4099	MAG	myelin associated glycoprotein
15	23620	NTSR2	neurotensin receptor 2
15	6285	S100B	S100 calcium binding protein B
15	221074	SLC39A12	solute carrier family 39 (zinc transporter), member 12
15	4974	OMG	oligodendrocyte myelin glycoprotein
15	116448	OLIG1	oligodendrocyte transcription factor 1
15	11170	FAM107A	family with sequence similarity 107, member A
15	10215	OLIG2	oligodendrocyte lineage transcription factor 2
15	285800	PRR18	proline rich 18
15	2861	GPR37	G protein-coupled receptor 37 (endothelin receptor type B-like)
15	2670	GFAP	glial fibrillary acidic protein
15	4336	MOBP	myelin-associated oligodendrocyte basic protein
15	1267	CNP	2',3'-cyclic nucleotide 3' phosphodiesterase
15	4340	MOG	myelin oligodendrocyte glycoprotein
15	9717	SEC14L5	SEC14-like 5 (S. cerevisiae)
15	203190	LGI3	leucine-rich repeat LGI family, member 3
15	4155	MBP	myelin basic protein
15	57471	ERMN	ermin, ERM-like protein
16	1476	CSTB	cystatin B (stefin B)
16	822	CAPG	capping protein (actin filament), gelsolin-like
16	6281	S100A10	S100 calcium binding protein A10
16	6282	S100A11	S100 calcium binding protein A11
16	26509	MYOF	myoferlin
16	8407	TAGLN2	transgelin 2
16	2012	EMP1	epithelial membrane protein 1
16	1192	CLIC1	chloride intracellular channel 1
16	5355	PLP2	proteolipid protein 2 (colonic epithelium-enriched)
16	301	ANXA1	annexin A1
16	302	ANXA2	annexin A2
16	10095	ARPC1B	actin related protein 2/3 complex, subunit 1B, 41kDa
16	5937	RBMS1	RNA binding motif, single stranded interacting protein 1
16	83442	SH3BGRL3	SH3 domain binding glutamate-rich protein like 3
16	3956	LGALS1	lectin, galactoside-binding, soluble, 1
16	3958	LGALS3	lectin, galactoside-binding, soluble, 3
16	824	CAPN2	calpain 2, (m/II) large subunit
16	308	ANXA5	annexin A5
17	55872	PBK	PDZ binding kinase
17	9088	PKMYT1	protein kinase, membrane associated tyrosine/threonine 1
17	83461	CDCA3	cell division cycle associated 3
17	93323	HAUS8	HAUS augmin-like complex, subunit 8
17	4288	MKI67	marker of proliferation Ki-67
17	9232	PTTG1	pituitary tumor-transforming 1
17	81624	DIAPH3	diaphanous-related formin 3
17	80346	REEP4	receptor accessory protein 4
17	113115	MTFR2	mitochondrial fission regulator 2
17	55388	MCM10	minichromosome maintenance complex component 10
17	990	CDC6	cell division cycle 6
17	128239	IQGAP3	IQ motif containing GTPase activating protein 3
17	7153	TOP2A	topoisomerase (DNA) II alpha 170kDa
17	80119	PIF1	PIF1 5'-to-3' DNA helicase
17	51512	GTSE1	G-2 and S-phase expressed 1
17	25788	RAD54B	RAD54 homolog B (S. cerevisiae)
17	2175	FANCA	Fanconi anemia, complementation group A
18	4640	MYO1A	myosin IA
18	1179	CLCA1	chloride channel accessory 1
18	2984	GUCY2C	guanylate cyclase 2C (heat stable enterotoxin receptor)
18	54825	CDHR2	cadherin-related family member 2
18	54474	KRT20	keratin 20
18	63928	CHP2	calcineurin-like EF-hand protein 2
18	10223	GPA33	glycoprotein A33 (transmembrane)
18	312	ANXA13	annexin A13
18	339977	LRRC66	leucine rich repeat containing 66
18	89870	TRIM15	tripartite motif containing 15
18	79574	EPS8L3	EPS8-like 3
18	1015	CDH17	cadherin 17, LI cadherin (liver-intestine)
18	3960	LGALS4	lectin, galactoside-binding, soluble, 4
18	1044	CDX1	caudal type homeobox 1
18	26	AOC1	amine oxidase, copper containing 1
18	56667	MUC13	mucin 13, cell surface associated
18	5948	RBP2	retinol binding protein 2, cellular
19	56896	DPYSL5	dihydropyrimidinase-like 5
19	11075	STMN2	stathmin 2
19	2596	GAP43	growth associated protein 43
19	84553	FAXC	failed axon connections homolog (Drosophila)
19	6860	SYT4	synaptotagmin IV
19	85455	DISP2	dispatched homolog 2 (Drosophila)
19	7857	SCG2	secretogranin II
19	29106	SCG3	secretogranin III
19	115827	RAB3C	RAB3C, member RAS oncogene family
19	347252	IGFBPL1	insulin-like growth factor binding protein-like 1
19	112885	PHF21B	PHD finger protein 21B
19	1400	CRMP1	collapsin response mediator protein 1
19	1113	CHGA	chromogranin A (parathyroid secretory protein 1)
19	29114	TAGLN3	transgelin 3
19	1114	CHGB	chromogranin B (secretogranin 1)
19	9118	INA	internexin neuronal intermediate filament protein, alpha
20	2819	GPD1	glycerol-3-phosphate dehydrogenase 1 (soluble)
20	2167	FABP4	fatty acid binding protein 4, adipocyte
20	729359	PLIN4	perilipin 4
20	3991	LIPE	lipase, hormone-sensitive
20	9370	ADIPOQ	adiponectin, C1Q and collagen domain containing
20	5468	PPARG	peroxisome proliferator-activated receptor gamma
20	7069	THRSP	thyroid hormone responsive
20	130399	ACVR1C	activin A receptor, type IC
20	84649	DGAT2	diacylglycerol O-acyltransferase 2
20	364	AQP7	aquaporin 7
20	63924	CIDEC	cell death-inducing DFFA-like effector c
20	56246	MRAP	melanocortin 2 receptor accessory protein
20	4023	LPL	lipoprotein lipase
20	948	CD36	CD36 molecule (thrombospondin receptor)
20	1149	CIDEA	cell death-inducing DFFA-like effector a
21	3200	HOXA3	homeobox A3
21	3201	HOXA4	homeobox A4
21	3202	HOXA5	homeobox A5
21	3219	HOXB9	homeobox B9
21	3212	HOXB2	homeobox B2
21	3213	HOXB3	homeobox B3
21	3214	HOXB4	homeobox B4
21	3215	HOXB5	homeobox B5
21	3216	HOXB6	homeobox B6
21	4211	MEIS1	Meis homeobox 1
21	3221	HOXC4	homeobox C4
21	3204	HOXA7	homeobox A7
21	3198	HOXA1	homeobox A1
21	3199	HOXA2	homeobox A2
22	3329	HSPD1	heat shock 60kDa protein 1 (chaperonin)
22	7203	CCT3	chaperonin containing TCP1, subunit 3 (gamma)
22	22948	CCT5	chaperonin containing TCP1, subunit 5 (epsilon)
22	3301	DNAJA1	DnaJ (Hsp40) homolog, subfamily A, member 1
22	10694	CCT8	chaperonin containing TCP1, subunit 8 (theta)
22	908	CCT6A	chaperonin containing TCP1, subunit 6A (zeta 1)
22	10575	CCT4	chaperonin containing TCP1, subunit 4 (delta)
22	10576	CCT2	chaperonin containing TCP1, subunit 2 (beta)
22	3320	HSP90AA1	heat shock protein 90kDa alpha (cytosolic), class A member 1
22	6950	TCP1	t-complex 1
22	1653	DDX1	DEAD (Asp-Glu-Ala-Asp) box helicase 1
22	10808	HSPH1	heat shock 105kDa/110kDa protein 1
22	27101	CACYBP	calcyclin binding protein
23	3008	HIST1H1E	histone cluster 1, H1e
23	8352	HIST1H3C	histone cluster 1, H3c
23	8354	HIST1H3I	histone cluster 1, H3i
23	8355	HIST1H3G	histone cluster 1, H3g
23	8358	HIST1H3B	histone cluster 1, H3b
23	8968	HIST1H3F	histone cluster 1, H3f
23	3017	HIST1H2BD	histone cluster 1, H2bd
23	8970	HIST1H2BJ	histone cluster 1, H2bj
23	92815	HIST3H2A	histone cluster 3, H2a
23	85236	HIST1H2BK	histone cluster 1, H2bk
23	3006	HIST1H1C	histone cluster 1, H1c
23	8350	HIST1H3A	histone cluster 1, H3a
24	284067	C17orf105	chromosome 17 open reading frame 105
24	7141	TNP1	transition protein 1 (during histone to protamine replacement)
24	168391	GALNTL5	polypeptide N-acetylgalactosaminyltransferase-like 5
24	127540	HMGB4	high mobility group box 4
24	5232	PGK2	phosphoglycerate kinase 2
24	122258	SPACA7	sperm acrosome associated 7
24	8852	AKAP4	A kinase (PRKA) anchor protein 4
24	339669	TEX33	testis expressed 33
24	5620	PRM2	protamine 2
24	93661	CAPZA3	capping protein (actin filament) muscle Z-line, alpha 3
25	4705	NDUFA10	NADH dehydrogenase (ubiquinone) 1 alpha subcomplex, 10, 42kDa
25	8802	SUCLG1	succinate-CoA ligase, alpha subunit
25	2821	GPI	glucose-6-phosphate isomerase
25	4719	NDUFS1	NADH dehydrogenase (ubiquinone) Fe-S protein 1, 75kDa (NADH-coenzyme Q reductase)
25	50	ACO2	aconitase 2, mitochondrial
25	2805	GOT1	glutamic-oxaloacetic transaminase 1, soluble
25	6389	SDHA	succinate dehydrogenase complex, subunit A, flavoprotein (Fp)
25	7384	UQCRC1	ubiquinol-cytochrome c reductase core protein I
25	506	ATP5B	ATP synthase, H+ transporting, mitochondrial F1 complex, beta polypeptide
25	4191	MDH2	malate dehydrogenase 2, NAD (mitochondrial)
26	94274	PPP1R14A	protein phosphatase 1, regulatory (inhibitor) subunit 14A
26	3779	KCNMB1	potassium large conductance calcium-activated channel, subfamily M, beta member 1
26	72	ACTG2	actin, gamma 2, smooth muscle, enteric
26	25802	LMOD1	leiomodin 1 (smooth muscle)
26	1264	CNN1	calponin 1, basic, smooth muscle
26	93649	MYOCD	myocardin
26	4629	MYH11	myosin, heavy chain 11, smooth muscle
26	5239	PGM5	phosphoglucomutase 5
26	10335	MRVI1	murine retrovirus integration site 1 homolog
26	51285	RASL12	RAS-like, family 12
27	56129	PCDHB7	protocadherin beta 7
27	56132	PCDHB3	protocadherin beta 3
27	57717	PCDHB16	protocadherin beta 16
27	26167	PCDHB5	protocadherin beta 5
27	56121	PCDHB15	protocadherin beta 15
27	56122	PCDHB14	protocadherin beta 14
27	56123	PCDHB13	protocadherin beta 13
27	56124	PCDHB12	protocadherin beta 12
27	56125	PCDHB11	protocadherin beta 11
28	7299	TYR	tyrosinase
28	1638	DCT	dopachrome tautomerase
28	4935	GPR143	G protein-coupled receptor 143
28	7306	TYRP1	tyrosinase-related protein 1
28	2315	MLANA	melan-A
28	51151	SLC45A2	solute carrier family 45, member 2
28	4308	TRPM1	transient receptor potential cation channel, subfamily M, member 1
28	4948	OCA2	oculocutaneous albinism II
28	6490	PMEL	premelanosome protein
29	2694	GIF	gastric intrinsic factor (vitamin B synthesis)
29	5225	PGC	progastricsin (pepsinogen C)
29	495	ATP4A	ATPase, H+/K+ exchanging, alpha polypeptide
29	496	ATP4B	ATPase, H+/K+ exchanging, beta polypeptide
29	200504	GKN2	gastrokine 2
29	51738	GHRL	ghrelin/obestatin prepropeptide
29	11199	ANXA10	annexin A10
29	56287	GKN1	gastrokine 1
30	117156	SCGB3A2	secretoglobin, family 3A, member 2
30	6439	SFTPB	surfactant protein B
30	6440	SFTPC	surfactant protein C
30	6441	SFTPD	surfactant protein D
30	92304	SCGB3A1	secretoglobin, family 3A, member 1
30	10568	SLC34A2	solute carrier family 34 (type II sodium/phosphate contransporter), member 2
30	51208	CLDN18	claudin 18
30	7356	SCGB1A1	secretoglobin, family 1A, member 1 (uteroglobin)
31	10657	KHDRBS1	KH domain containing, RNA binding, signal transduction associated 1
31	3181	HNRNPA2B1	heterogeneous nuclear ribonucleoprotein A2/B1
31	3184	HNRNPD	heterogeneous nuclear ribonucleoprotein D (AU-rich element RNA binding protein 1, 37kDa)
31	6421	SFPQ	splicing factor proline/glutamine-rich
31	3192	HNRNPU	heterogeneous nuclear ribonucleoprotein U (scaffold attachment factor A)
31	6428	SRSF3	serine/arginine-rich splicing factor 3
31	4670	HNRNPM	heterogeneous nuclear ribonucleoprotein M
32	226	ALDOA	aldolase A, fructose-bisphosphate
32	3939	LDHA	lactate dehydrogenase A
32	2821	GPI	glucose-6-phosphate isomerase
32	5223	PGAM1	phosphoglycerate mutase 1 (brain)
32	5315	PKM	pyruvate kinase, muscle
32	4282	MIF	macrophage migration inhibitory factor (glycosylation-inhibiting factor)
32	7167	TPI1	triosephosphate isomerase 1
33	51747	LUC7L3	LUC7-like 3 (S. cerevisiae)
33	55749	CCAR1	cell division cycle and apoptosis regulator 1
33	9360	PPIG	peptidylprolyl isomerase G (cyclophilin G)
33	57187	THOC2	THO complex 2
33	51575	ESF1	ESF1, nucleolar pre-rRNA processing protein, homolog (S. cerevisiae)
33	80155	NAA15	N(alpha)-acetyltransferase 15, NatA auxiliary subunit
34	3075	CFH	complement factor H
34	710	SERPING1	serpin peptidase inhibitor, clade G (C1 inhibitor), member 1
34	715	C1R	complement component 1, r subcomponent
34	716	C1S	complement component 1, s subcomponent
34	718	C3	complement component 3
34	5919	RARRES2	retinoic acid receptor responder (tazarotene induced) 2
35	9376	SLC22A8	solute carrier family 22 (organic anion transporter), member 8
35	55586	MIOX	myo-inositol oxygenase
35	6569	SLC34A1	solute carrier family 34 (type II sodium/phosphate contransporter), member 1
35	9356	SLC22A6	solute carrier family 22 (organic anion transporter), member 6
35	64849	SLC13A3	solute carrier family 13 (sodium-dependent dicarboxylate transporter), member 3
35	159963	SLC5A12	solute carrier family 5 (sodium/monocarboxylate cotransporter), member 12
36	1291	COL6A1	collagen, type VI, alpha 1
36	1292	COL6A2	collagen, type VI, alpha 2
36	112464	PRKCDBP	protein kinase C, delta binding protein
36	284119	PTRF	polymerase I and transcript release factor
36	857	CAV1	caveolin 1, caveolae protein, 22kDa
36	30846	EHD2	EH-domain containing 2
37	55303	GIMAP4	GTPase, IMAP family member 4
37	474344	GIMAP6	GTPase, IMAP family member 6
37	55340	GIMAP5	GTPase, IMAP family member 5
37	170575	GIMAP1	GTPase, IMAP family member 1
37	168537	GIMAP7	GTPase, IMAP family member 7
37	155038	GIMAP8	GTPase, IMAP family member 8
38	2115	ETV1	ets variant 1
38	2119	ETV5	ets variant 5
38	10253	SPRY2	sprouty homolog 2 (Drosophila)
38	161742	SPRED1	sprouty-related, EVH1 domain containing 1
38	81848	SPRY4	sprouty homolog 4 (Drosophila)
38	1848	DUSP6	dual specificity phosphatase 6
39	5476	CTSA	cathepsin A
39	57192	MCOLN1	mucolipin 1
39	527	ATP6V0C	ATPase, H+ transporting, lysosomal 16kDa, V0 subunit c
39	537	ATP6AP1	ATPase, H+ transporting, lysosomal accessory protein 1
39	9114	ATP6V0D1	ATPase, H+ transporting, lysosomal 38kDa, V0 subunit d1
40	55586	MIOX	myo-inositol oxygenase
40	7369	UMOD	uromodulin
40	3758	KCNJ1	potassium inwardly-rectifying channel, subfamily J, member 1
40	131920	TMEM207	transmembrane protein 207
40	157724	SLC7A13	solute carrier family 7 (anionic amino acid transporter), member 13
41	1188	CLCNKB	chloride channel, voltage-sensitive Kb
41	359	AQP2	aquaporin 2 (collecting duct)
41	3758	KCNJ1	potassium inwardly-rectifying channel, subfamily J, member 1
41	643236	TMEM72	transmembrane protein 72
41	155006	TMEM213	transmembrane protein 213
42	10528	NOP56	NOP56 ribonucleoprotein
42	54433	GAR1	GAR1 ribonucleoprotein
42	23076	RRP1B	ribosomal RNA processing 1B
42	9221	NOLC1	nucleolar and coiled-body phosphoprotein 1
42	1736	DKC1	dyskeratosis congenita 1, dyskerin
43	54470	ARMCX6	armadillo repeat containing, X-linked 6
43	51309	ARMCX1	armadillo repeat containing, X-linked 1
43	51566	ARMCX3	armadillo repeat containing, X-linked 3
43	90843	TCEAL8	transcription elongation factor A (SII)-like 8
43	9823	ARMCX2	armadillo repeat containing, X-linked 2
44	3236	HOXD10	homeobox D10
44	3237	HOXD11	homeobox D11
44	3206	HOXA10	homeobox A10
44	3207	HOXA11	homeobox A11
45	3232	HOXD3	homeobox D3
45	3233	HOXD4	homeobox D4
45	3234	HOXD8	homeobox D8
45	3231	HOXD1	homeobox D1
46	5896	RAG1	recombination activating gene 1
46	5897	RAG2	recombination activating gene 2
46	1791	DNTT	DNA nucleotidylexotransferase
46	7441	VPREB1	pre-B lymphocyte 1
47	6720	SREBF1	sterol regulatory element binding transcription factor 1
47	2194	FASN	fatty acid synthase
47	31	ACACA	acetyl-CoA carboxylase alpha
47	6319	SCD	stearoyl-CoA desaturase (delta-9-desaturase)
48	5705	PSMC5	proteasome (prosome, macropain) 26S subunit, ATPase, 5
48	7203	CCT3	chaperonin containing TCP1, subunit 3 (gamma)
48	10574	CCT7	chaperonin containing TCP1, subunit 7 (eta)
48	10726	NUDC	nudC nuclear distribution protein
49	1584	CYP11B1	cytochrome P450, family 11, subfamily B, polypeptide 1
49	6770	STAR	steroidogenic acute regulatory protein
49	3284	HSD3B2	hydroxy-delta-5-steroid dehydrogenase, 3 beta- and steroid delta-isomerase 2
49	1589	CYP21A2	cytochrome P450, family 21, subfamily A, polypeptide 2
50	1200	TPP1	tripeptidyl peptidase I
50	1508	CTSB	cathepsin B
50	3074	HEXB	hexosaminidase B (beta polypeptide)
50	5476	CTSA	cathepsin A
51	2720	GLB1	galactosidase, beta 1
51	3073	HEXA	hexosaminidase A (alpha polypeptide)
51	3074	HEXB	hexosaminidase B (beta polypeptide)
51	5476	CTSA	cathepsin A
52	7203	CCT3	chaperonin containing TCP1, subunit 3 (gamma)
52	22948	CCT5	chaperonin containing TCP1, subunit 5 (epsilon)
52	10574	CCT7	chaperonin containing TCP1, subunit 7 (eta)
52	8607	RUVBL1	RuvB-like AAA ATPase 1
53	92312	MEX3A	mex-3 RNA binding family member A
53	6664	SOX11	SRY (sex determining region Y)-box 11
53	57216	VANGL2	VANGL planar cell polarity protein 2
53	55506	H2AFY2	H2A histone family, member Y2
54	23768	FLRT2	fibronectin leucine rich transmembrane protein 2
54	9353	SLIT2	slit homolog 2 (Drosophila)
54	54510	PCDH18	protocadherin 18
54	27303	RBMS3	RNA binding motif, single stranded interacting protein 3
55	5682	PSMA1	proteasome (prosome, macropain) subunit, alpha type, 1
55	5684	PSMA3	proteasome (prosome, macropain) subunit, alpha type, 3
55	5686	PSMA5	proteasome (prosome, macropain) subunit, alpha type, 5
55	5687	PSMA6	proteasome (prosome, macropain) subunit, alpha type, 6
56	92304	SCGB3A1	secretoglobin, family 3A, member 1
56	51297	BPIFA1	BPI fold containing family A, member 1
56	92747	BPIFB1	BPI fold containing family B, member 1
56	7356	SCGB1A1	secretoglobin, family 1A, member 1 (uteroglobin)
57	522	ATP5J	ATP synthase, H+ transporting, mitochondrial Fo complex, subunit F6
57	51258	MRPL51	mitochondrial ribosomal protein L51
57	4709	NDUFB3	NADH dehydrogenase (ubiquinone) 1 beta subcomplex, 3, 12kDa
57	9551	ATP5J2	ATP synthase, H+ transporting, mitochondrial Fo complex, subunit F2
58	27018	NGFRAP1	nerve growth factor receptor (TNFRSF16) associated protein 1
58	55859	BEX1	brain expressed, X-linked 1
58	56271	BEX4	brain expressed, X-linked 4
58	84707	BEX2	brain expressed X-linked 2
59	1649	DDIT3	DNA-damage-inducible transcript 3
59	467	ATF3	activating transcription factor 3
59	23645	PPP1R15A	protein phosphatase 1, regulatory subunit 15A
59	79094	CHAC1	ChaC, cation transport regulator homolog 1 (E. coli)
60	26952	SMR3A	submaxillary gland androgen regulated protein 3A
60	4025	LPO	lactoperoxidase
60	140683	BPIFA2	BPI fold containing family A, member 2
60	765	CA6	carbonic anhydrase VI
61	64499	TPSB2	tryptase beta 2 (gene/pseudogene)
61	1215	CMA1	chymase 1, mast cell
61	2206	MS4A2	membrane-spanning 4-domains, subfamily A, member 2
61	1359	CPA3	carboxypeptidase A3 (mast cell)
62	527	ATP6V0C	ATPase, H+ transporting, lysosomal 16kDa, V0 subunit c
62	826	CAPNS1	calpain, small subunit 1
62	8079	MLF2	myeloid leukemia factor 2
62	8775	NAPA	N-ethylmaleimide-sensitive factor attachment protein, alpha
63	27018	NGFRAP1	nerve growth factor receptor (TNFRSF16) associated protein 1
63	90843	TCEAL8	transcription elongation factor A (SII)-like 8
63	51186	WBP5	WW domain binding protein 5
63	56271	BEX4	brain expressed, X-linked 4
64	6888	TALDO1	transaldolase 1
64	5226	PGD	phosphogluconate dehydrogenase
64	2539	G6PD	glucose-6-phosphate dehydrogenase
64	7086	TKT	transketolase
65	79083	MLPH	melanophilin
65	57535	KIAA1324	KIAA1324
65	25803	SPDEF	SAM pointed domain containing ETS transcription factor
65	10551	AGR2	anterior gradient 2
66	57761	TRIB3	tribbles pseudokinase 3
66	83667	SESN2	sestrin 2
66	79094	CHAC1	ChaC, cation transport regulator homolog 1 (E. coli)
66	1649	DDIT3	DNA-damage-inducible transcript 3
67	6571	SLC18A2	solute carrier family 18 (vesicular monoamine transporter), member 2
67	2205	FCER1A	Fc fragment of IgE, high affinity I, receptor for; alpha polypeptide
67	2206	MS4A2	membrane-spanning 4-domains, subfamily A, member 2
67	1359	CPA3	carboxypeptidase A3 (mast cell)
68	6536	SLC6A9	solute carrier family 6 (neurotransmitter transporter, glycine), member 9
68	57761	TRIB3	tribbles pseudokinase 3
68	6509	SLC1A4	solute carrier family 1 (glutamate/neutral amino acid transporter), member 4
68	79094	CHAC1	ChaC, cation transport regulator homolog 1 (E. coli)
69	1536	CYBB	cytochrome b-245, beta polypeptide
69	9450	LY86	lymphocyte antigen 86
69	1524	CX3CR1	chemokine (C-X3-C motif) receptor 1
69	64805	P2RY12	purinergic receptor P2Y, G-protein coupled, 12
70	3123	HLA-DRB1	major histocompatibility complex, class II, DR beta 1
70	972	CD74	CD74 molecule, major histocompatibility complex, class II invariant chain
70	3109	HLA-DMB	major histocompatibility complex, class II, DM beta
70	4261	CIITA	class II, major histocompatibility complex, transactivator
